# Supplementary material
Source: HighWire-hosted journal article supplement (doi:10.1101/rna.080272.124)
Supplement: Supplemental_Table_S4_.xlsx [file Supplemental_Table_S4_.xlsx]

## Sheet: Sheet1
Dubious ORFs excluded from analysis
YNL198C
YDL068W
YGR291C
Could not be grown from the constructed library
YDR335W
YLR035C
YDL232W
YJR139C
YDR470C
YDL142C
YGR150C
YHR147C
YNL076W
YHR191C
YCR006C
YBR044C
